# Supplementary material
Source: PubMed Central journal article supplement (PMC2896008)

## Arlt and Glover, Supplemental Figure 2

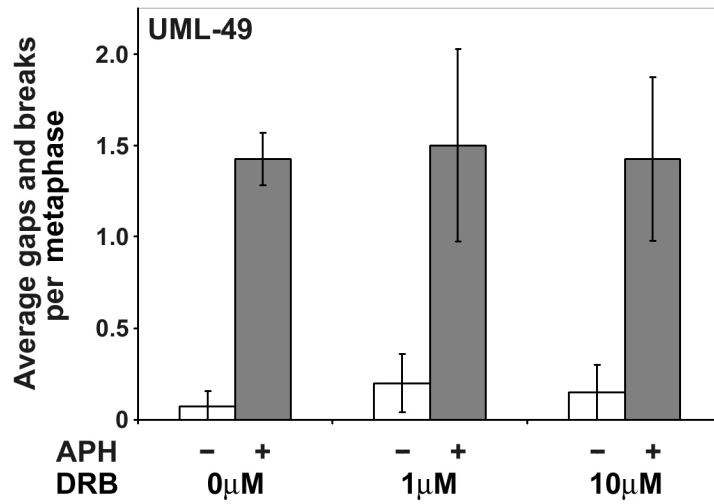

Supplement: NIHMS199459-supplement-03.pdf [file NIHMS199459-supplement-03.pdf]
